# Supplementary material
Source: PubMed Central journal article supplement (PMC7964302)
Supplement: 14-00760.pdf [file 14-00760.pdf]

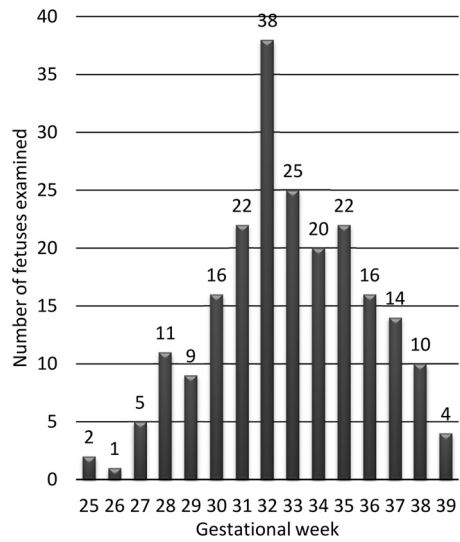

**ON-LINE FIG 1.** Distribution of the number of fetuses examined by gestational week.

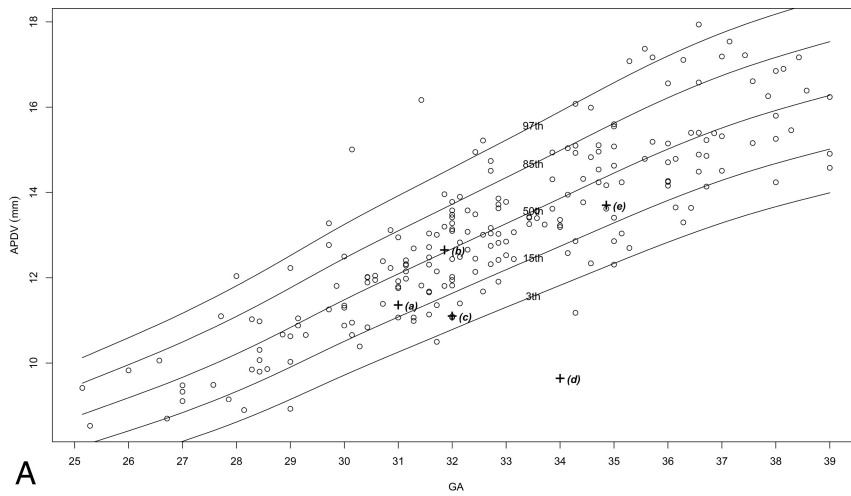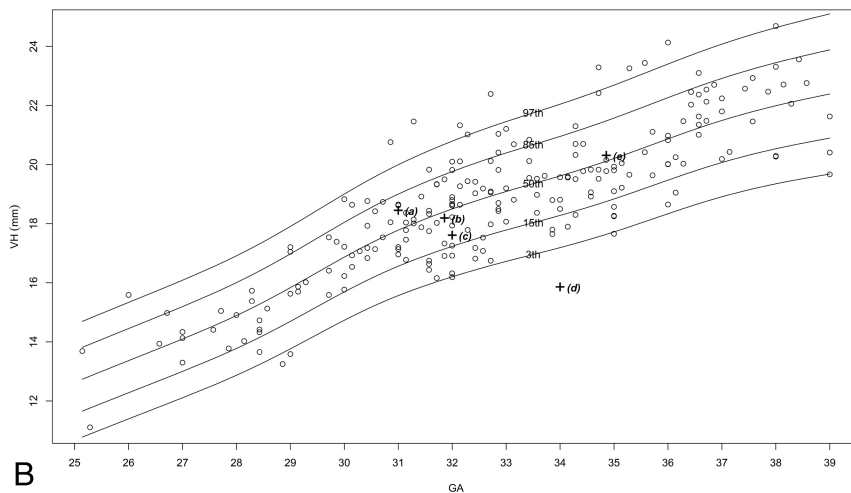

**ON-LINE FIG 2.** Percentile curves for previously reported parameters. A, Anteroposterior diameter of the vermis. B, Vermian height.

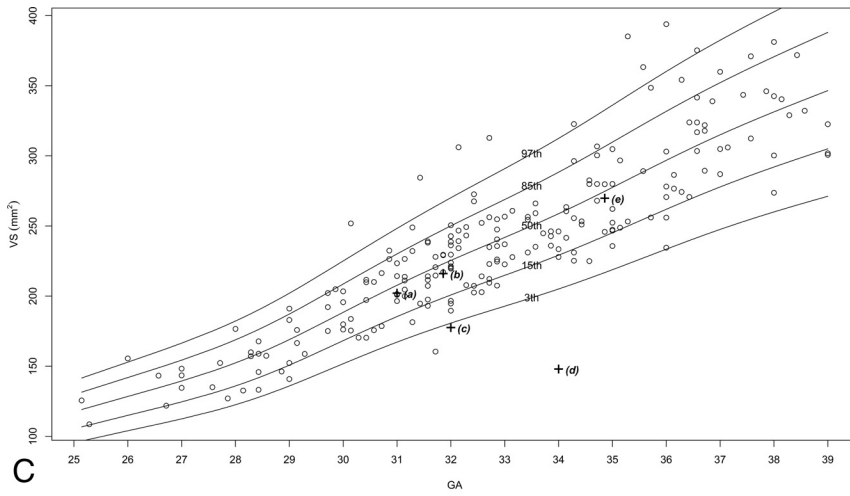

C

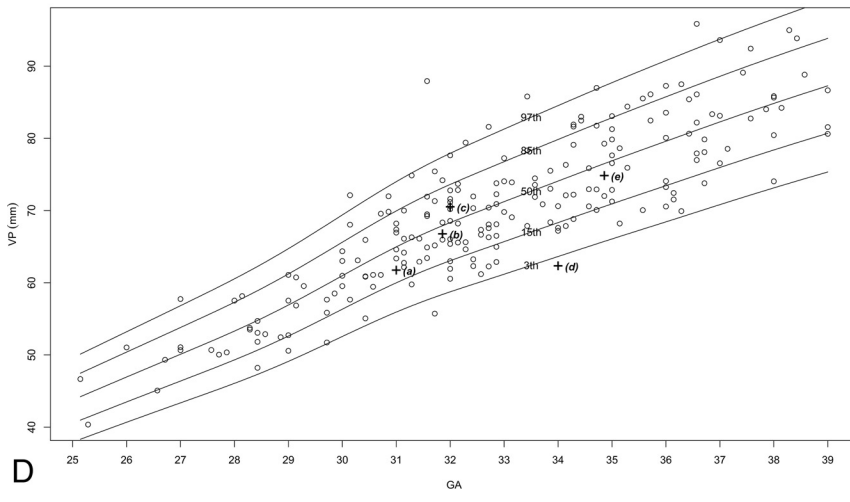

D

**ON-LINE FIG 2.** Continued. *C*, Vermian cross-sectional area. *D*, Vermian perimeter.

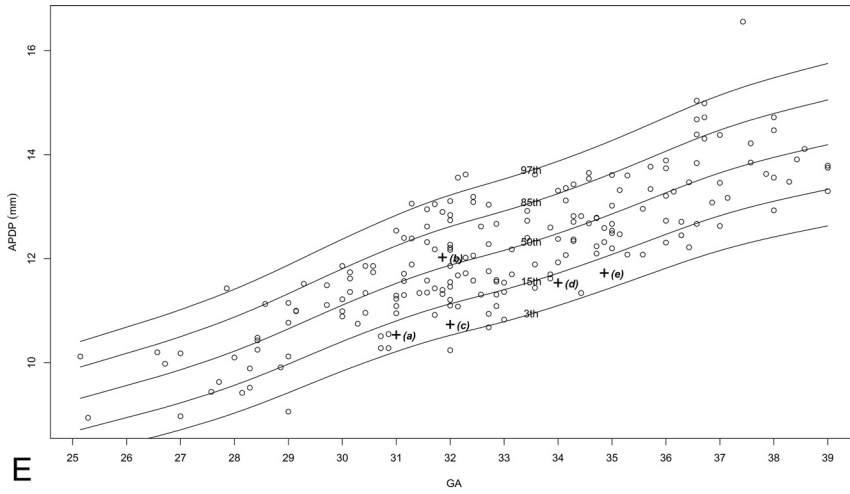

**E**

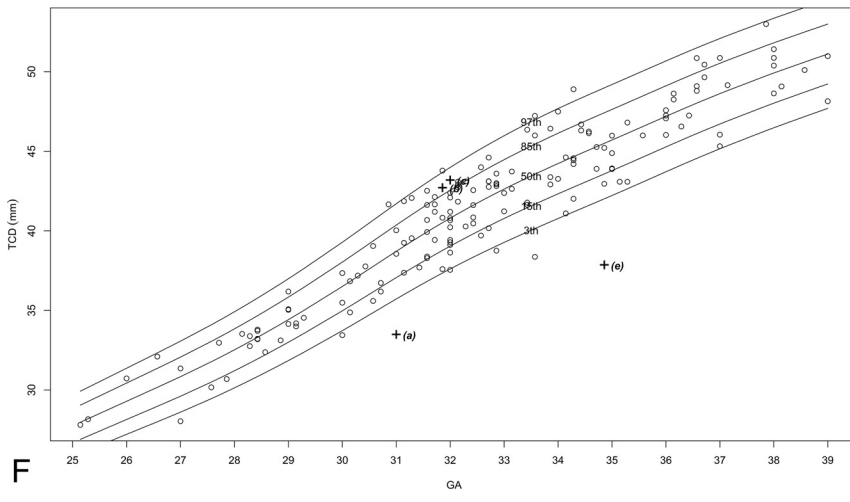

**F**

**ON-LINE FIG 2.** Continued. *E*, Pontine anteroposterior diameter. *F*, Transcerebellar diameter.

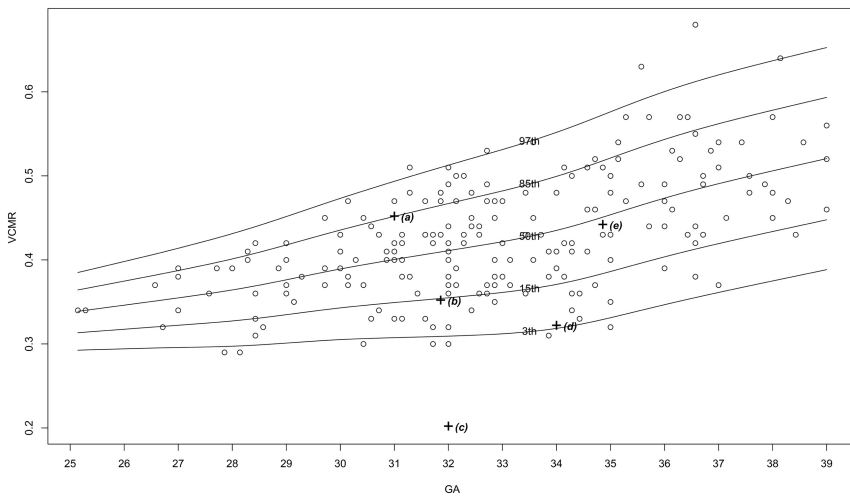

**ON-LINE FIG 3.** Percentile curves for vermiformis-to-cisterna magna ratio.

**On-line Table 1: Examination indications and findings**

|                                                                                      | No. | Percentage of Cohort |
|--------------------------------------------------------------------------------------|-----|----------------------|
| Indication                                                                           |     |                      |
| Mild lateral ventricular asymmetry and/or ventriculomegaly on ultrasound examination | 60  | 28                   |
| Suspected anomaly on ultrasound examination                                          | 53  | 25                   |
| Maternal CMV infection                                                               | 52  | 24                   |
| Extracranial anomalies on ultrasound examination                                     | 22  | 10                   |
| Genetic disorder                                                                     | 6   | 3                    |
| Disorders in the family or in previous pregnancies                                   | 22  | 10                   |
| Finding                                                                              |     |                      |
| No brain abnormalities                                                               | 171 | 80                   |
| Mild lateral ventricular asymmetry and/or ventriculomegaly                           | 44  | 20                   |

**Note:**—CMV indicates cytomegalovirus.

**On-line Table 2: Number of examination images selected for measurement per structure**

| Structure                                   | No. |
|---------------------------------------------|-----|
| Anteroposterior diameter of the vermis      | 211 |
| Vermian height                              | 211 |
| Vermian cross-sectional area                | 211 |
| Vermian perimeter                           | 211 |
| Vermian anterior lobe cross-sectional area  | 200 |
| Vermian posterior lobe cross-sectional area | 200 |
| Anteroposterior diameter of the pons        | 191 |
| Pontine height                              | 191 |
| Pontine cross-sectional area                | 190 |
| Brain stem cross-sectional area             | 179 |
| Cisterna magna cross-sectional area         | 203 |
| Transcerebellar diameter                    | 155 |
| Cerebellar cross-sectional area             | 155 |
| Cerebellar perimeter                        | 155 |
| Cerebellar hemispheres                      | 151 |

**On-line Table 3: Normal percentiles for anteroposterior diameter of the vermis**

| Gestational Week | 3rd Percentile (mm) | 15th Percentile (mm) | 50th Percentile (mm) | 85th Percentile (mm) | 97th Percentile (mm) |
|------------------|---------------------|----------------------|----------------------|----------------------|----------------------|
| 26               | 7.86 ± 0.07         | 8.5 ± 0.08           | 9.29 ± 0.09          | 10.07 ± 0.1          | 10.71 ± 0.1          |
| 27               | 8.17 ± 0.13         | 8.84 ± 0.14          | 9.67 ± 0.16          | 10.5 ± 0.18          | 11.17 ± 0.19         |
| 28               | 8.62 ± 0.15         | 9.34 ± 0.16          | 10.22 ± 0.18         | 11.1 ± 0.2           | 11.81 ± 0.21         |
| 29               | 9.15 ± 0.17         | 9.91 ± 0.19          | 10.84 ± 0.2          | 11.77 ± 0.21         | 12.52 ± 0.23         |
| 30               | 9.72 ± 0.17         | 10.51 ± 0.18         | 11.48 ± 0.19         | 12.45 ± 0.21         | 13.25 ± 0.22         |
| 31               | 10.26 ± 0.16        | 11.08 ± 0.17         | 12.09 ± 0.18         | 13.1 ± 0.19          | 13.92 ± 0.2          |
| 32               | 10.79 ± 0.16        | 11.64 ± 0.17         | 12.68 ± 0.18         | 13.72 ± 0.19         | 14.58 ± 0.2          |
| 33               | 11.31 ± 0.16        | 12.19 ± 0.17         | 13.27 ± 0.18         | 14.35 ± 0.19         | 15.23 ± 0.2          |
| 34               | 11.82 ± 0.16        | 12.74 ± 0.17         | 13.86 ± 0.18         | 14.98 ± 0.2          | 15.9 ± 0.21          |
| 35               | 12.34 ± 0.16        | 13.29 ± 0.17         | 14.45 ± 0.18         | 15.62 ± 0.19         | 16.57 ± 0.2          |
| 36               | 12.83 ± 0.15        | 13.81 ± 0.15         | 15.01 ± 0.16         | 16.22 ± 0.17         | 17.2 ± 0.18          |
| 37               | 13.28 ± 0.13        | 14.28 ± 0.13         | 15.51 ± 0.14         | 16.74 ± 0.15         | 17.73 ± 0.15         |
| 38               | 13.66 ± 0.11        | 14.68 ± 0.11         | 15.92 ± 0.12         | 17.17 ± 0.12         | 18.18 ± 0.12         |
| 39               | 13.92 ± 0.06        | 14.95 ± 0.06         | 16.2 ± 0.06          | 17.46 ± 0.07         | 18.48 ± 0.07         |

**On-line Table 4: Normal percentiles for vermian height**

| Gestational Week | 3rd Percentile (mm) | 15th Percentile (mm) | 50th Percentile (mm) | 85th Percentile (mm) | 97th Percentile (mm) |
|------------------|---------------------|----------------------|----------------------|----------------------|----------------------|
| 26               | 11.55 ± 0.13        | 12.43 ± 0.13         | 13.52 ± 0.13         | 14.61 ± 0.14         | 15.5 ± 0.14          |
| 27               | 12.11 ± 0.22        | 13 ± 0.23            | 14.1 ± 0.23          | 15.2 ± 0.24          | 16.09 ± 0.24         |
| 28               | 12.88 ± 0.25        | 13.78 ± 0.26         | 14.9 ± 0.27          | 16.01 ± 0.27         | 16.92 ± 0.28         |
| 29               | 13.77 ± 0.29        | 14.7 ± 0.3           | 15.84 ± 0.31         | 16.98 ± 0.32         | 17.91 ± 0.33         |
| 30               | 14.73 ± 0.29        | 15.68 ± 0.3          | 16.86 ± 0.31         | 18.04 ± 0.32         | 19 ± 0.33            |
| 31               | 15.56 ± 0.22        | 16.55 ± 0.24         | 17.77 ± 0.25         | 18.99 ± 0.26         | 19.99 ± 0.27         |
| 32               | 16.2 ± 0.18         | 17.23 ± 0.19         | 18.49 ± 0.2          | 19.76 ± 0.21         | 20.79 ± 0.22         |
| 33               | 16.72 ± 0.15        | 17.78 ± 0.16         | 19.09 ± 0.17         | 20.39 ± 0.18         | 21.45 ± 0.19         |
| 34               | 17.19 ± 0.15        | 18.28 ± 0.16         | 19.62 ± 0.17         | 20.96 ± 0.18         | 22.04 ± 0.19         |
| 35               | 17.73 ± 0.18        | 18.84 ± 0.19         | 20.21 ± 0.2          | 21.58 ± 0.21         | 22.69 ± 0.21         |
| 36               | 18.33 ± 0.19        | 19.47 ± 0.2          | 20.87 ± 0.2          | 22.26 ± 0.21         | 23.4 ± 0.22          |
| 37               | 18.9 ± 0.16         | 20.06 ± 0.16         | 21.49 ± 0.17         | 22.91 ± 0.18         | 24.07 ± 0.19         |
| 38               | 19.34 ± 0.12        | 20.53 ± 0.12         | 21.99 ± 0.14         | 23.44 ± 0.15         | 24.63 ± 0.16         |
| 39               | 19.61 ± 0.06        | 20.82 ± 0.06         | 22.31 ± 0.07         | 23.79 ± 0.08         | 25 ± 0.08            |

**On-line Table 5: Normal percentiles for VS**

| Gestational Week | 3rd Percentile (mm <sup>2</sup> ) | 15th Percentile (mm <sup>2</sup> ) | 50th Percentile (mm <sup>2</sup> ) | 85th Percentile (mm <sup>2</sup> ) | 97th Percentile (mm <sup>2</sup> ) |
|------------------|-----------------------------------|------------------------------------|------------------------------------|------------------------------------|------------------------------------|
| 26               | 105.76 ± 1.54                     | 116.98 ± 1.75                      | 130.75 ± 2                         | 144.52 ± 2.25                      | 155.74 ± 2.45                      |
| 27               | 112.54 ± 2.8                      | 124.67 ± 3.18                      | 139.56 ± 3.64                      | 154.45 ± 4.09                      | 166.57 ± 4.47                      |
| 28               | 122.67 ± 3.58                     | 136.07 ± 4                         | 152.53 ± 4.52                      | 168.98 ± 5.03                      | 182.39 ± 5.45                      |
| 29               | 136.03 ± 4.63                     | 150.88 ± 5.1                       | 169.11 ± 5.68                      | 187.33 ± 6.26                      | 202.18 ± 6.73                      |
| 30               | 151.74 ± 4.92                     | 168.2 ± 5.44                       | 188.4 ± 6.08                       | 208.59 ± 6.71                      | 225.05 ± 7.23                      |
| 31               | 167.09 ± 4.49                     | 185.29 ± 5.05                      | 207.64 ± 5.74                      | 229.99 ± 6.43                      | 248.2 ± 6.99                       |
| 32               | 180.65 ± 3.91                     | 200.73 ± 4.5                       | 225.37 ± 5.22                      | 250 ± 5.94                         | 270.08 ± 6.53                      |
| 33               | 192.8 ± 3.67                      | 214.82 ± 4.29                      | 241.85 ± 5.05                      | 268.89 ± 5.81                      | 290.91 ± 6.42                      |
| 34               | 205.12 ± 4                        | 229.23 ± 4.67                      | 258.83 ± 5.49                      | 288.43 ± 6.32                      | 312.54 ± 6.99                      |
| 35               | 218.84 ± 4.44                     | 245.16 ± 5.12                      | 277.48 ± 5.96                      | 309.8 ± 6.8                        | 336.12 ± 7.48                      |
| 36               | 233.41 ± 4.5                      | 261.84 ± 5.11                      | 296.74 ± 5.85                      | 331.64 ± 6.59                      | 360.07 ± 7.2                       |
| 37               | 247.45 ± 4.11                     | 277.73 ± 4.65                      | 314.9 ± 5.32                       | 352.07 ± 5.99                      | 382.34 ± 6.53                      |
| 38               | 259.94 ± 3.62                     | 291.97 ± 4.16                      | 331.28 ± 4.82                      | 370.6 ± 5.48                       | 402.63 ± 6.03                      |
| 39               | 268.83 ± 2.02                     | 302.26 ± 2.36                      | 343.29 ± 2.77                      | 384.32 ± 3.18                      | 417.75 ± 3.51                      |

**On-line Table 6: Normal percentiles for VP**

| Gestational Week | 3rd Percentile (mm) | 15th Percentile (mm) | 50th Percentile (mm) | 85th Percentile (mm) | 97th Percentile (mm) |
|------------------|---------------------|----------------------|----------------------|----------------------|----------------------|
| 26               | 41.25 ± 0.5         | 44.11 ± 0.53         | 47.62 ± 0.58         | 51.12 ± 0.63         | 53.98 ± 0.67         |
| 27               | 43.36 ± 0.82        | 46.38 ± 0.89         | 50.09 ± 0.97         | 53.8 ± 1.06          | 56.82 ± 1.12         |
| 28               | 46.08 ± 0.87        | 49.33 ± 0.95         | 53.32 ± 1.04         | 57.31 ± 1.13         | 60.56 ± 1.2          |
| 29               | 49.13 ± 1.01        | 52.63 ± 1.1          | 56.93 ± 1.2          | 61.24 ± 1.3          | 64.74 ± 1.38         |
| 30               | 52.55 ± 1.08        | 56.33 ± 1.17         | 60.97 ± 1.27         | 65.61 ± 1.38         | 69.39 ± 1.46         |
| 31               | 55.91 ± 0.97        | 59.96 ± 1.05         | 64.94 ± 1.15         | 69.91 ± 1.25         | 73.97 ± 1.34         |
| 32               | 58.73 ± 0.78        | 63.03 ± 0.85         | 68.31 ± 0.94         | 73.59 ± 1.02         | 77.9 ± 1.09          |
| 33               | 61.18 ± 0.75        | 65.69 ± 0.81         | 71.23 ± 0.89         | 76.77 ± 0.96         | 81.28 ± 1.02         |
| 34               | 63.63 ± 0.76        | 68.32 ± 0.81         | 74.08 ± 0.88         | 79.84 ± 0.94         | 84.53 ± 0.99         |
| 35               | 66.06 ± 0.74        | 70.92 ± 0.79         | 76.89 ± 0.85         | 82.85 ± 0.91         | 87.71 ± 0.96         |
| 36               | 68.43 ± 0.73        | 73.45 ± 0.77         | 79.6 ± 0.83          | 85.75 ± 0.88         | 90.76 ± 0.93         |
| 37               | 70.81 ± 0.73        | 75.96 ± 0.77         | 82.27 ± 0.81         | 88.58 ± 0.86         | 93.72 ± 0.89         |
| 38               | 73.13 ± 0.7         | 78.38 ± 0.73         | 84.83 ± 0.77         | 91.28 ± 0.81         | 96.53 ± 0.84         |
| 39               | 74.87 ± 0.4         | 80.21 ± 0.42         | 86.76 ± 0.44         | 93.3 ± 0.47          | 98.64 ± 0.49         |

**On-line Table 7: Normal percentiles for pontine anteroposterior diameter**

| Gestational Week | 3rd Percentile (mm) | 15th Percentile (mm) | 50th Percentile (mm) | 85th Percentile (mm) | 97th Percentile (mm) |
|------------------|---------------------|----------------------|----------------------|----------------------|----------------------|
| 26               | 8.49 ± 0.05         | 9 ± 0.05             | 9.62 ± 0.05          | 10.25 ± 0.06         | 10.75 ± 0.06         |
| 27               | 8.71 ± 0.09         | 9.23 ± 0.1           | 9.87 ± 0.1           | 10.5 ± 0.11          | 11.02 ± 0.11         |
| 28               | 9.03 ± 0.11         | 9.57 ± 0.12          | 10.22 ± 0.12         | 10.88 ± 0.13         | 11.42 ± 0.13         |
| 29               | 9.42 ± 0.13         | 9.97 ± 0.13          | 10.65 ± 0.14         | 11.33 ± 0.15         | 11.88 ± 0.15         |
| 30               | 9.84 ± 0.12         | 10.4 ± 0.13          | 11.1 ± 0.14          | 11.8 ± 0.14          | 12.37 ± 0.15         |
| 31               | 10.21 ± 0.11        | 10.8 ± 0.11          | 11.52 ± 0.12         | 12.24 ± 0.13         | 12.83 ± 0.13         |
| 32               | 10.52 ± 0.08        | 11.13 ± 0.09         | 11.87 ± 0.09         | 12.61 ± 0.1          | 13.22 ± 0.1          |
| 33               | 10.79 ± 0.09        | 11.41 ± 0.09         | 12.16 ± 0.09         | 12.92 ± 0.09         | 13.53 ± 0.1          |
| 34               | 11.1 ± 0.1          | 11.72 ± 0.11         | 12.49 ± 0.11         | 13.25 ± 0.11         | 13.88 ± 0.11         |
| 35               | 11.45 ± 0.11        | 12.08 ± 0.12         | 12.86 ± 0.12         | 13.64 ± 0.13         | 14.28 ± 0.13         |
| 36               | 11.82 ± 0.11        | 12.47 ± 0.12         | 13.27 ± 0.13         | 14.07 ± 0.13         | 14.72 ± 0.14         |
| 37               | 12.15 ± 0.09        | 12.82 ± 0.1          | 13.65 ± 0.11         | 14.47 ± 0.11         | 15.14 ± 0.12         |
| 38               | 12.42 ± 0.07        | 13.1 ± 0.08          | 13.95 ± 0.08         | 14.79 ± 0.09         | 15.48 ± 0.09         |
| 39               | 12.59 ± 0.04        | 13.28 ± 0.04         | 14.14 ± 0.04         | 15 ± 0.05            | 15.7 ± 0.05          |

**On-line Table 8: Normal percentiles for TCD**

| Gestational Week | 3rd Percentile (mm) | 15th Percentile (mm) | 50th Percentile (mm) | 85th Percentile (mm) | 97th Percentile (mm) |
|------------------|---------------------|----------------------|----------------------|----------------------|----------------------|
| 26               | 27.51 ± 0.25        | 28.46 ± 0.27         | 29.62 ± 0.28         | 30.78 ± 0.3          | 31.73 ± 0.31         |
| 27               | 28.62 ± 0.45        | 29.62 ± 0.47         | 30.85 ± 0.49         | 32.08 ± 0.52         | 33.08 ± 0.54         |
| 28               | 30.14 ± 0.5         | 31.21 ± 0.52         | 32.53 ± 0.55         | 33.85 ± 0.58         | 34.92 ± 0.6          |
| 29               | 31.86 ± 0.56        | 33.01 ± 0.58         | 34.43 ± 0.62         | 35.85 ± 0.65         | 37 ± 0.68            |
| 30               | 33.74 ± 0.6         | 34.98 ± 0.63         | 36.52 ± 0.66         | 38.05 ± 0.7          | 39.29 ± 0.73         |
| 31               | 35.71 ± 0.61        | 37.06 ± 0.64         | 38.71 ± 0.67         | 40.36 ± 0.71         | 41.7 ± 0.74          |
| 32               | 37.6 ± 0.55         | 39.03 ± 0.57         | 40.79 ± 0.6          | 42.54 ± 0.64         | 43.98 ± 0.66         |
| 33               | 39.27 ± 0.48        | 40.77 ± 0.5          | 42.62 ± 0.53         | 44.46 ± 0.55         | 45.97 ± 0.57         |
| 34               | 40.77 ± 0.45        | 42.32 ± 0.46         | 44.22 ± 0.47         | 46.13 ± 0.48         | 47.68 ± 0.49         |
| 35               | 42.22 ± 0.45        | 43.79 ± 0.45         | 45.71 ± 0.45         | 47.63 ± 0.46         | 49.2 ± 0.46          |
| 36               | 43.71 ± 0.46        | 45.27 ± 0.46         | 47.19 ± 0.46         | 49.11 ± 0.45         | 50.67 ± 0.45         |
| 37               | 45.15 ± 0.42        | 46.71 ± 0.42         | 48.61 ± 0.42         | 50.52 ± 0.41         | 52.08 ± 0.41         |
| 38               | 46.47 ± 0.39        | 48.02 ± 0.39         | 49.91 ± 0.38         | 51.81 ± 0.38         | 53.35 ± 0.38         |
| 39               | 47.44 ± 0.22        | 48.97 ± 0.22         | 50.86 ± 0.22         | 52.75 ± 0.22         | 54.28 ± 0.21         |

**On-line Table 9: Normal percentiles for vermian anterior lobe cross-sectional area**

| Gestational Week | 3rd Percentile (mm <sup>2</sup> ) | 15th Percentile (mm <sup>2</sup> ) | 50th Percentile (mm <sup>2</sup> ) | 85th Percentile (mm <sup>2</sup> ) | 97th Percentile (mm <sup>2</sup> ) |
|------------------|-----------------------------------|------------------------------------|------------------------------------|------------------------------------|------------------------------------|
| 26               | 36.96 ± 0.45                      | 42.15 ± 0.55                       | 48.52 ± 0.68                       | 54.89 ± 0.81                       | 60.07 ± 0.91                       |
| 27               | 39.03 ± 0.91                      | 44.68 ± 1.11                       | 51.62 ± 1.35                       | 58.56 ± 1.58                       | 64.21 ± 1.78                       |
| 28               | 42.5 ± 1.29                       | 48.81 ± 1.5                        | 56.55 ± 1.76                       | 64.3 ± 2.02                        | 70.61 ± 2.23                       |
| 29               | 47.41 ± 1.73                      | 54.42 ± 1.95                       | 63.02 ± 2.22                       | 71.63 ± 2.49                       | 78.64 ± 2.71                       |
| 30               | 53.4 ± 1.92                       | 61.14 ± 2.15                       | 70.64 ± 2.43                       | 80.14 ± 2.72                       | 87.88 ± 2.95                       |
| 31               | 59.47 ± 1.79                      | 67.98 ± 2.03                       | 78.42 ± 2.32                       | 88.85 ± 2.61                       | 97.36 ± 2.85                       |
| 32               | 64.74 ± 1.48                      | 74.02 ± 1.72                       | 85.4 ± 2.01                        | 96.79 ± 2.3                        | 106.06 ± 2.54                      |
| 33               | 69.26 ± 1.33                      | 79.33 ± 1.59                       | 91.7 ± 1.9                         | 104.06 ± 2.21                      | 114.13 ± 2.47                      |
| 34               | 73.5 ± 1.3                        | 84.44 ± 1.59                       | 97.88 ± 1.94                       | 111.31 ± 2.29                      | 122.26 ± 2.57                      |
| 35               | 77.74 ± 1.31                      | 89.65 ± 1.62                       | 104.28 ± 2.01                      | 118.91 ± 2.39                      | 130.82 ± 2.7                       |
| 36               | 81.94 ± 1.28                      | 94.91 ± 1.61                       | 110.81 ± 2.02                      | 126.72 ± 2.43                      | 139.69 ± 2.76                      |
| 37               | 85.97 ± 1.18                      | 100.04 ± 1.53                      | 117.31 ± 1.97                      | 134.58 ± 2.4                       | 148.65 ± 2.76                      |
| 38               | 89.48 ± 0.98                      | 104.73 ± 1.36                      | 123.46 ± 1.82                      | 142.18 ± 2.29                      | 157.43 ± 2.66                      |
| 39               | 91.82 ± 0.51                      | 108.06 ± 0.75                      | 127.99 ± 1.04                      | 147.93 ± 1.34                      | 164.17 ± 1.58                      |

**On-line Table 10: Normal percentiles for vermian posterior lobe cross-sectional area**

| Gestational Week | 3rd Percentile (mm <sup>2</sup> ) | 15th Percentile (mm <sup>2</sup> ) | 50th Percentile (mm <sup>2</sup> ) | 85th Percentile (mm <sup>2</sup> ) | 97th Percentile (mm <sup>2</sup> ) |
|------------------|-----------------------------------|------------------------------------|------------------------------------|------------------------------------|------------------------------------|
| 26               | 62.03 ± 0.72                      | 68.38 ± 0.91                       | 76.18 ± 1.14                       | 83.98 ± 1.36                       | 90.34 ± 1.55                       |
| 27               | 65.26 ± 1.36                      | 72.45 ± 1.72                       | 81.29 ± 2.17                       | 90.13 ± 2.61                       | 97.32 ± 2.97                       |
| 28               | 70.25 ± 1.81                      | 78.71 ± 2.22                       | 89.09 ± 2.74                       | 99.46 ± 3.25                       | 107.92 ± 3.66                      |
| 29               | 77.14 ± 2.43                      | 87.04 ± 2.91                       | 99.2 ± 3.49                        | 111.35 ± 4.08                      | 121.26 ± 4.56                      |
| 30               | 85.48 ± 2.63                      | 97.02 ± 3.16                       | 111.19 ± 3.81                      | 125.35 ± 4.46                      | 136.89 ± 4.99                      |
| 31               | 93.55 ± 2.29                      | 106.87 ± 2.86                      | 123.23 ± 3.56                      | 139.58 ± 4.25                      | 152.91 ± 4.82                      |
| 32               | 100.45 ± 2.02                     | 115.62 ± 2.59                      | 134.24 ± 3.28                      | 152.86 ± 3.98                      | 168.04 ± 4.54                      |
| 33               | 107.08 ± 2.13                     | 124 ± 2.64                         | 144.77 ± 3.26                      | 165.54 ± 3.88                      | 182.46 ± 4.39                      |
| 34               | 114.7 ± 2.62                      | 133.15 ± 3.06                      | 155.8 ± 3.59                       | 178.45 ± 4.13                      | 196.9 ± 4.56                       |
| 35               | 124.19 ± 3.22                     | 143.88 ± 3.54                      | 168.05 ± 3.93                      | 192.22 ± 4.32                      | 211.91 ± 4.64                      |
| 36               | 135.2 ± 3.53                      | 155.67 ± 3.7                       | 180.8 ± 3.9                        | 205.93 ± 4.1                       | 226.4 ± 4.27                       |
| 37               | 146.58 ± 3.43                     | 167.41 ± 3.5                       | 192.98 ± 3.58                      | 218.54 ± 3.66                      | 239.37 ± 3.72                      |
| 38               | 157.26 ± 3.17                     | 178.23 ± 3.2                       | 203.98 ± 3.24                      | 229.73 ± 3.28                      | 250.71 ± 3.31                      |
| 39               | 165.17 ± 1.83                     | 186.22 ± 1.84                      | 212.07 ± 1.86                      | 237.91 ± 1.88                      | 258.96 ± 1.9                       |

**On-line Table 11: Normal percentiles for pontine height**

| Gestational Week | 3rd Percentile (mm) | 15th Percentile (mm) | 50th Percentile (mm) | 85th Percentile (mm) | 97th Percentile (mm) |
|------------------|---------------------|----------------------|----------------------|----------------------|----------------------|
| 26               | 9.72 ± 0.04         | 10.34 ± 0.04         | 11.1 ± 0.05          | 11.87 ± 0.06         | 12.49 ± 0.06         |
| 27               | 9.87 ± 0.06         | 10.52 ± 0.07         | 11.32 ± 0.08         | 12.11 ± 0.09         | 12.76 ± 0.1          |
| 28               | 10.08 ± 0.07        | 10.76 ± 0.08         | 11.59 ± 0.09         | 12.42 ± 0.1          | 13.1 ± 0.11          |
| 29               | 10.33 ± 0.09        | 11.04 ± 0.1          | 11.91 ± 0.11         | 12.78 ± 0.12         | 13.48 ± 0.13         |
| 30               | 10.64 ± 0.1         | 11.38 ± 0.11         | 12.27 ± 0.11         | 13.17 ± 0.12         | 13.91 ± 0.13         |
| 31               | 10.94 ± 0.08        | 11.69 ± 0.09         | 12.61 ± 0.09         | 13.53 ± 0.09         | 14.28 ± 0.1          |
| 32               | 11.18 ± 0.07        | 11.93 ± 0.07         | 12.86 ± 0.07         | 13.78 ± 0.07         | 14.54 ± 0.06         |
| 33               | 11.41 ± 0.07        | 12.15 ± 0.07         | 13.06 ± 0.06         | 13.97 ± 0.05         | 14.71 ± 0.05         |
| 34               | 11.67 ± 0.09        | 12.39 ± 0.08         | 13.27 ± 0.07         | 14.15 ± 0.06         | 14.86 ± 0.05         |
| 35               | 12 ± 0.11           | 12.69 ± 0.11         | 13.53 ± 0.09         | 14.38 ± 0.08         | 15.07 ± 0.07         |
| 36               | 12.41 ± 0.14        | 13.07 ± 0.13         | 13.88 ± 0.12         | 14.69 ± 0.11         | 15.35 ± 0.1          |
| 37               | 12.88 ± 0.15        | 13.51 ± 0.14         | 14.29 ± 0.13         | 15.06 ± 0.12         | 15.7 ± 0.11          |
| 38               | 13.36 ± 0.14        | 13.97 ± 0.14         | 14.71 ± 0.13         | 15.46 ± 0.12         | 16.06 ± 0.11         |
| 39               | 13.72 ± 0.08        | 14.31 ± 0.08         | 15.03 ± 0.07         | 15.75 ± 0.07         | 16.34 ± 0.06         |

**On-line Table 12: Normal percentiles for pontine cross-sectional area**

| Gestational Week | 3rd Percentile (mm <sup>2</sup> ) | 15th Percentile (mm <sup>2</sup> ) | 50th Percentile (mm <sup>2</sup> ) | 85th Percentile (mm <sup>2</sup> ) | 97th Percentile (mm <sup>2</sup> ) |
|------------------|-----------------------------------|------------------------------------|------------------------------------|------------------------------------|------------------------------------|
| 26               | 79.86 ± 0.87                      | 88.19 ± 0.98                       | 98.42 ± 1.11                       | 108.65 ± 1.25                      | 116.99 ± 1.36                      |
| 27               | 83.58 ± 1.49                      | 92.39 ± 1.68                       | 103.22 ± 1.92                      | 114.04 ± 2.16                      | 122.86 ± 2.35                      |
| 28               | 88.8 ± 1.81                       | 98.25 ± 2.01                       | 109.86 ± 2.26                      | 121.47 ± 2.5                       | 130.93 ± 2.71                      |
| 29               | 95.4 ± 2.24                       | 105.52 ± 2.45                      | 117.95 ± 2.71                      | 130.38 ± 2.97                      | 140.51 ± 3.18                      |
| 30               | 102.89 ± 2.31                     | 113.68 ± 2.51                      | 126.94 ± 2.76                      | 140.19 ± 3                         | 150.99 ± 3.2                       |
| 31               | 109.95 ± 2.03                     | 121.33 ± 2.19                      | 135.29 ± 2.38                      | 149.26 ± 2.56                      | 160.63 ± 2.72                      |
| 32               | 116.22 ± 1.89                     | 127.98 ± 1.97                      | 142.43 ± 2.08                      | 156.87 ± 2.19                      | 168.64 ± 2.27                      |
| 33               | 122.58 ± 2.08                     | 134.51 ± 2.1                       | 149.16 ± 2.12                      | 163.81 ± 2.15                      | 175.75 ± 2.17                      |
| 34               | 129.77 ± 2.35                     | 141.73 ± 2.35                      | 156.4 ± 2.34                       | 171.08 ± 2.34                      | 183.04 ± 2.34                      |
| 35               | 137.77 ± 2.59                     | 149.72 ± 2.59                      | 164.39 ± 2.59                      | 179.06 ± 2.6                       | 191.01 ± 2.6                       |
| 36               | 146.5 ± 2.78                      | 158.47 ± 2.79                      | 173.16 ± 2.8                       | 187.85 ± 2.81                      | 199.82 ± 2.82                      |
| 37               | 155.39 ± 2.64                     | 167.38 ± 2.64                      | 182.09 ± 2.64                      | 196.81 ± 2.65                      | 208.79 ± 2.65                      |
| 38               | 163.27 ± 2.22                     | 175.27 ± 2.23                      | 189.99 ± 2.23                      | 204.71 ± 2.23                      | 216.7 ± 2.23                       |
| 39               | 168.64 ± 1.2                      | 180.64 ± 1.2                       | 195.36 ± 1.2                       | 210.09 ± 1.2                       | 222.08 ± 1.2                       |

**On-line Table 13: Normal percentiles for CMS**

| Gestational Week | 3rd Percentile (mm <sup>2</sup> ) | 15th Percentile (mm <sup>2</sup> ) | 50th Percentile (mm <sup>2</sup> ) | 85th Percentile (mm <sup>2</sup> ) | 97th Percentile (mm <sup>2</sup> ) |
|------------------|-----------------------------------|------------------------------------|------------------------------------|------------------------------------|------------------------------------|
| 26               | 314.99 ± 3.23                     | 339.41 ± 3.86                      | 369.39 ± 4.62                      | 399.37 ± 5.39                      | 423.79 ± 6.01                      |
| 27               | 328.93 ± 5.57                     | 356.25 ± 6.81                      | 389.78 ± 8.33                      | 423.31 ± 9.86                      | 450.63 ± 11.1                      |
| 28               | 347.6 ± 6.02                      | 379.22 ± 7.45                      | 418.04 ± 9.21                      | 456.86 ± 10.97                     | 488.48 ± 12.4                      |
| 29               | 368.21 ± 6.77                     | 404.8 ± 8.39                       | 449.71 ± 10.39                     | 494.62 ± 12.39                     | 531.21 ± 14.01                     |
| 30               | 391.22 ± 7.33                     | 433.31 ± 9.08                      | 484.97 ± 11.23                     | 536.63 ± 13.38                     | 578.72 ± 15.14                     |
| 31               | 414.12 ± 6.62                     | 461.93 ± 8.38                      | 520.61 ± 10.54                     | 579.29 ± 12.71                     | 627.1 ± 14.47                      |
| 32               | 433.56 ± 5.37                     | 486.96 ± 7.04                      | 552.5 ± 9.1                        | 618.04 ± 11.16                     | 671.44 ± 12.84                     |
| 33               | 448.95 ± 4.14                     | 507.59 ± 5.71                      | 579.57 ± 7.62                      | 651.55 ± 9.54                      | 710.19 ± 11.1                      |
| 34               | 460.27 ± 2.83                     | 523.76 ± 4.24                      | 601.69 ± 5.98                      | 679.62 ± 7.72                      | 743.1 ± 9.14                       |
| 35               | 467.56 ± 1.85                     | 535.31 ± 3.06                      | 618.47 ± 4.55                      | 701.63 ± 6.04                      | 769.38 ± 7.26                      |
| 36               | 473.89 ± 2.14                     | 545.34 ± 3.23                      | 633.05 ± 4.57                      | 720.76 ± 5.91                      | 792.21 ± 7                         |
| 37               | 480.95 ± 2.06                     | 555.89 ± 3.13                      | 647.87 ± 4.44                      | 739.86 ± 5.76                      | 814.8 ± 6.83                       |
| 38               | 486.45 ± 1.33                     | 564.93 ± 2.45                      | 661.27 ± 3.83                      | 757.61 ± 5.21                      | 836.1 ± 6.34                       |
| 39               | 489.27 ± 0.54                     | 570.68 ± 1.24                      | 670.61 ± 2.1                       | 770.54 ± 2.96                      | 851.95 ± 3.66                      |

**On-line Table 14: Normal percentiles for brain stem cross-sectional area**

| Gestational Week | 3rd Percentile (mm <sup>2</sup> ) | 15th Percentile (mm <sup>2</sup> ) | 50th Percentile (mm <sup>2</sup> ) | 85th Percentile (mm <sup>2</sup> ) | 97th Percentile (mm <sup>2</sup> ) |
|------------------|-----------------------------------|------------------------------------|------------------------------------|------------------------------------|------------------------------------|
| 26               | 228.87 ± 3.44                     | 244.62 ± 3.62                      | 263.95 ± 3.84                      | 283.28 ± 4.06                      | 299.03 ± 4.24                      |
| 27               | 243.23 ± 5.52                     | 259.76 ± 5.83                      | 280.04 ± 6.21                      | 300.33 ± 6.59                      | 316.85 ± 6.9                       |
| 28               | 260.78 ± 5.26                     | 278.32 ± 5.59                      | 299.86 ± 5.98                      | 321.4 ± 6.38                       | 338.95 ± 6.7                       |
| 29               | 277.26 ± 4.94                     | 295.86 ± 5.26                      | 318.69 ± 5.66                      | 341.52 ± 6.05                      | 360.11 ± 6.38                      |
| 30               | 293.48 ± 5.18                     | 313.07 ± 5.48                      | 337.13 ± 5.83                      | 361.18 ± 6.19                      | 380.78 ± 6.48                      |
| 31               | 311.24 ± 5.64                     | 331.7 ± 5.89                       | 356.82 ± 6.19                      | 381.95 ± 6.49                      | 402.41 ± 6.74                      |
| 32               | 328.53 ± 4.95                     | 349.76 ± 5.17                      | 375.81 ± 5.45                      | 401.86 ± 5.72                      | 423.08 ± 5.94                      |
| 33               | 342.84 ± 3.87                     | 364.82 ± 4.12                      | 391.79 ± 4.43                      | 418.77 ± 4.73                      | 440.74 ± 4.99                      |
| 34               | 354.08 ± 3.17                     | 377.02 ± 3.52                      | 405.17 ± 3.94                      | 433.32 ± 4.37                      | 456.25 ± 4.72                      |
| 35               | 364.26 ± 3.18                     | 388.54 ± 3.67                      | 418.33 ± 4.26                      | 448.13 ± 4.86                      | 472.4 ± 5.34                       |
| 36               | 374.63 ± 3.13                     | 400.72 ± 3.78                      | 432.75 ± 4.57                      | 464.78 ± 5.37                      | 490.87 ± 6.01                      |
| 37               | 383.76 ± 2.45                     | 412.23 ± 3.26                      | 447.17 ± 4.25                      | 482.12 ± 5.25                      | 510.58 ± 6.06                      |
| 38               | 390.43 ± 1.7                      | 421.66 ± 2.58                      | 459.99 ± 3.67                      | 498.32 ± 4.75                      | 529.55 ± 5.64                      |
| 39               | 394.29 ± 0.8                      | 427.83 ± 1.37                      | 469.01 ± 2.06                      | 510.19 ± 2.75                      | 543.74 ± 3.31                      |

**On-line Table 15: Normal percentiles for cerebellar perimeter**

| Gestational Week | 3rd Percentile (mm) | 15th Percentile (mm) | 50th Percentile (mm) | 85th Percentile (mm) | 97th Percentile (mm) |
|------------------|---------------------|----------------------|----------------------|----------------------|----------------------|
| 26               | 82.25 ± 0.68        | 86.23 ± 0.74         | 91.12 ± 0.82         | 96 ± 0.9             | 99.98 ± 0.96         |
| 27               | 85.17 ± 1.16        | 89.42 ± 1.27         | 94.64 ± 1.4          | 99.85 ± 1.54         | 104.1 ± 1.65         |
| 28               | 89.09 ± 1.28        | 93.71 ± 1.4          | 99.37 ± 1.54         | 105.04 ± 1.68        | 109.65 ± 1.8         |
| 29               | 93.61 ± 1.54        | 98.62 ± 1.66         | 104.77 ± 1.82        | 110.92 ± 1.97        | 115.93 ± 2.1         |
| 30               | 99.07 ± 1.8         | 104.49 ± 1.92        | 111.15 ± 2.08        | 117.8 ± 2.23         | 123.22 ± 2.36        |
| 31               | 105.18 ± 1.92       | 110.99 ± 2.03        | 118.12 ± 2.17        | 125.25 ± 2.31        | 131.06 ± 2.42        |
| 32               | 111.24 ± 1.81       | 117.36 ± 1.88        | 124.86 ± 1.98        | 132.37 ± 2.07        | 138.48 ± 2.15        |
| 33               | 116.87 ± 1.67       | 123.16 ± 1.7         | 130.89 ± 1.74        | 138.62 ± 1.78        | 144.91 ± 1.81        |
| 34               | 122.11 ± 1.57       | 128.41 ± 1.54        | 136.15 ± 1.5         | 143.88 ± 1.47        | 150.18 ± 1.44        |
| 35               | 127.15 ± 1.56       | 133.25 ± 1.47        | 140.74 ± 1.36        | 148.23 ± 1.25        | 154.33 ± 1.16        |
| 36               | 132.32 ± 1.62       | 138.07 ± 1.5         | 145.14 ± 1.35        | 152.2 ± 1.2          | 157.95 ± 1.08        |
| 37               | 137.52 ± 1.58       | 142.85 ± 1.44        | 149.4 ± 1.27         | 155.94 ± 1.11        | 161.27 ± 0.97        |
| 38               | 142.57 ± 1.54       | 147.46 ± 1.4         | 153.46 ± 1.24        | 159.46 ± 1.08        | 164.35 ± 0.94        |
| 39               | 146.45 ± 0.9        | 151.01 ± 0.83        | 156.61 ± 0.74        | 162.2 ± 0.64         | 166.76 ± 0.57        |



**On-line Table 16: Normal percentiles for cerebellar cross-sectional area**

| Gestational Week | 3rd Percentile (mm <sup>2</sup> ) | 15th Percentile (mm <sup>2</sup> ) | 50th Percentile (mm <sup>2</sup> ) | 85th Percentile (mm <sup>2</sup> ) | 97th Percentile (mm <sup>2</sup> ) |
|------------------|-----------------------------------|------------------------------------|------------------------------------|------------------------------------|------------------------------------|
| 26               | 4.27 ± 0.07                       | 4.65 ± 0.08                        | 5.11 ± 0.08                        | 5.58 ± 0.09                        | 5.96 ± 0.1                         |
| 27               | 4.57 ± 0.13                       | 4.98 ± 0.14                        | 5.48 ± 0.15                        | 5.98 ± 0.16                        | 6.39 ± 0.18                        |
| 28               | 5.02 ± 0.15                       | 5.47 ± 0.17                        | 6.01 ± 0.18                        | 6.56 ± 0.2                         | 7.01 ± 0.21                        |
| 29               | 5.57 ± 0.19                       | 6.06 ± 0.2                         | 6.66 ± 0.22                        | 7.26 ± 0.24                        | 7.75 ± 0.25                        |
| 30               | 6.24 ± 0.22                       | 6.78 ± 0.24                        | 7.44 ± 0.26                        | 8.11 ± 0.28                        | 8.65 ± 0.29                        |
| 31               | 7.01 ± 0.25                       | 7.6 ± 0.26                         | 8.33 ± 0.28                        | 9.05 ± 0.3                         | 9.64 ± 0.32                        |
| 32               | 7.81 ± 0.24                       | 8.45 ± 0.26                        | 9.23 ± 0.27                        | 10.02 ± 0.29                       | 10.66 ± 0.31                       |
| 33               | 8.56 ± 0.23                       | 9.25 ± 0.24                        | 10.1 ± 0.26                        | 10.94 ± 0.28                       | 11.63 ± 0.29                       |
| 34               | 9.29 ± 0.22                       | 10.02 ± 0.24                       | 10.92 ± 0.25                       | 11.82 ± 0.27                       | 12.56 ± 0.28                       |
| 35               | 10.02 ± 0.23                      | 10.79 ± 0.24                       | 11.74 ± 0.25                       | 12.68 ± 0.27                       | 13.45 ± 0.28                       |
| 36               | 10.78 ± 0.24                      | 11.58 ± 0.24                       | 12.56 ± 0.25                       | 13.54 ± 0.27                       | 14.35 ± 0.27                       |
| 37               | 11.53 ± 0.23                      | 12.36 ± 0.23                       | 13.37 ± 0.24                       | 14.39 ± 0.25                       | 15.21 ± 0.26                       |
| 38               | 12.26 ± 0.22                      | 13.1 ± 0.23                        | 14.14 ± 0.23                       | 15.18 ± 0.24                       | 16.03 ± 0.25                       |
| 39               | 12.82 ± 0.13                      | 13.68 ± 0.13                       | 14.74 ± 0.14                       | 15.79 ± 0.14                       | 16.66 ± 0.15                       |

**On-line Table 17: Normal percentiles for VCMR**

| Gestational Week | 3rd Percentile | 15th Percentile | 50th Percentile | 85th Percentile | 97th Percentile |
|------------------|----------------|-----------------|-----------------|-----------------|-----------------|
| 26               | 4.27 ± 0.07    | 4.65 ± 0.08     | 5.11 ± 0.08     | 5.58 ± 0.09     | 5.96 ± 0.1      |
| 27               | 4.57 ± 0.13    | 4.98 ± 0.14     | 5.48 ± 0.15     | 5.98 ± 0.16     | 6.39 ± 0.18     |
| 28               | 5.02 ± 0.15    | 5.47 ± 0.17     | 6.01 ± 0.18     | 6.56 ± 0.2      | 7.01 ± 0.21     |
| 29               | 5.57 ± 0.19    | 6.06 ± 0.2      | 6.66 ± 0.22     | 7.26 ± 0.24     | 7.75 ± 0.25     |
| 30               | 6.24 ± 0.22    | 6.78 ± 0.24     | 7.44 ± 0.26     | 8.11 ± 0.28     | 8.65 ± 0.29     |
| 31               | 7.01 ± 0.25    | 7.6 ± 0.26      | 8.33 ± 0.28     | 9.05 ± 0.3      | 9.64 ± 0.32     |
| 32               | 7.81 ± 0.24    | 8.45 ± 0.26     | 9.23 ± 0.27     | 10.02 ± 0.29    | 10.66 ± 0.31    |
| 33               | 8.56 ± 0.23    | 9.25 ± 0.24     | 10.1 ± 0.26     | 10.94 ± 0.28    | 11.63 ± 0.29    |
| 34               | 9.29 ± 0.22    | 10.02 ± 0.24    | 10.92 ± 0.25    | 11.82 ± 0.27    | 12.56 ± 0.28    |
| 35               | 10.02 ± 0.23   | 10.79 ± 0.24    | 11.74 ± 0.25    | 12.68 ± 0.27    | 13.45 ± 0.28    |
| 36               | 10.78 ± 0.24   | 11.58 ± 0.24    | 12.56 ± 0.25    | 13.54 ± 0.27    | 14.35 ± 0.27    |
| 37               | 11.53 ± 0.23   | 12.36 ± 0.23    | 13.37 ± 0.24    | 14.39 ± 0.25    | 15.21 ± 0.26    |
| 38               | 12.26 ± 0.22   | 13.1 ± 0.23     | 14.14 ± 0.23    | 15.18 ± 0.24    | 16.03 ± 0.25    |
| 39               | 12.82 ± 0.13   | 13.68 ± 0.13    | 14.74 ± 0.14    | 15.79 ± 0.14    | 16.66 ± 0.15    |

**On-line Table 18: Normal percentiles for VLR and CHR**

| Parameter | 3rd Percentile | 15th Percentile | 50th Percentile | 85th Percentile | 97th Percentile |
|-----------|----------------|-----------------|-----------------|-----------------|-----------------|
| VLR       | 0.47 ± 0.02    | 0.54 ± 0.015    | 0.63 ± 0.014    | 0.72 ± 0.02     | 0.80 ± 0.03     |
| CHR       | 0.89 ± 0.02    | 0.94 ± 0.01     | 1.00 ± 0.01     | 1.06 ± 0.03     | 1.11 ± 0.04     |

**On-line Table 19: ICC coefficient between 2 measurers**

| Variable                | ICC   | 95% CI      | Mean Difference | Standard Difference | 95% Level of Agreement |
|-------------------------|-------|-------------|-----------------|---------------------|------------------------|
| CS (cm <sup>2</sup> )   | 0.983 | (0.96–0.99) | 0.275           | 0.371               | (–0.45,1)              |
| CP (mm)                 | 0.977 | (0.95–0.99) | 2.528           | 2.553               | (–2.48,7.53)           |
| TCD (mm)                | 0.975 | (0.94–0.99) | 0.867           | 0.947               | (–0.99,2.72)           |
| VH (mm)                 | 0.964 | (0.92–0.98) | 0.319           | 0.58                | (–0.82,1.46)           |
| CMS (mm <sup>2</sup> )  | 0.96  | (0.91–0.98) | –20.434         | 22.022              | (–63.6,22.73)          |
| VS (mm <sup>2</sup> )   | 0.954 | (0.9–0.98)  | 10.774          | 13.712              | (–16.1,37.65)          |
| VALS (mm <sup>2</sup> ) | 0.954 | (0.9–0.98)  | 1.385           | 6.556               | (–11.46,14.23)         |
| VPLS (mm <sup>2</sup> ) | 0.938 | (0.87–0.97) | 6.706           | 10.424              | (–13.72,27.14)         |
| BSS (mm <sup>2</sup> )  | 0.889 | (0.77–0.95) | 4.31            | 24.82               | (–44.34,52.96)         |
| PS (mm <sup>2</sup> )   | 0.871 | (0.73–0.94) | –0.352          | 13.292              | (–26.4,25.7)           |
| APDV (mm)               | 0.824 | (0.64–0.92) | 0.415           | 1.09                | (–1.72,2.55)           |
| APDP (mm)               | 0.804 | (0.61–0.91) | 0.177           | 0.704               | (–1.2,1.56)            |
| VP (mm)                 | 0.68  | (0.4–0.84)  | 5.5             | 5.308               | (–4.9,15.9)            |
| PH (mm)                 | 0.68  | (0.4–0.84)  | 0.253           | 0.803               | (–1.32,1.83)           |

**Note:**—APDP indicates pontine anteroposterior diameter; PH, pontine height; PS, pontine cross-sectional area; CS, cerebellar cross-sectional area; CP, cerebellar perimeter; VH, vermian height; VALS, vermian anterior lobe cross-sectional area; VPLS, vermian posterior lobe cross-sectional area; BSS, brain stem cross-sectional area; APDP, anteroposterior diameter of the pons.
